# Supplementary material for: Synergistic Effects of Plastid Terminal Oxidases 1 and 2 in Astaxanthin Regulation under Stress Conditions
Source: MDPI journal article supplement (doi:10.3390/pr12040804), 2024-04-17
Supplement: s1 [file s1]

## Supplementary Materials

**Table S1. Primers involved in this study.**

| Name            | Sequence (5'→3')                     | Primer length | T <sub>m</sub> (°C) | Annealing Temperature (°C) |
|-----------------|--------------------------------------|---------------|---------------------|----------------------------|
| ptox1-forward-F | CTAGCTAGCAGCCGGGCCGCCTACTCGGT        | 29            | 73.64               | 64                         |
| ptox1-forward-R | GAGCTGCACCACCTGCAGGTGTGGGTTGGAAGCGGG | 36            | 76.52               |                            |
| ptox1-reverse-F | CTAGGATCCCTGGTGGTGGTGAAGGGAGG        | 29            | 68.09               | 62                         |
| ptox1-reverse-R | CTACACGTGAGCCGGGCCGCCTACTCGGT        | 29            | 73.73               |                            |
| ptox1-intron-F  | CCCGCTTCCAACCCACACCTGCAGGTGGTGCAGCTC | 36            | 76.52               | 63.5                       |
| ptox1-intron-R  | CGCGGATCCCTGCAGGTGGTGCAGCTCGT        | 29            | 74.68               |                            |
| ptox2-forward-F | cgcGCTAGCACGGTGGCGCGCATCCCCTA        | 29            | 76.64               | 63.5                       |
| ptox2-forward-R | CCCTTCCAAAATACACACCTGGCACGCCACCATGGT | 36            | 71.09               |                            |
| ptox2-reverse-F | CGCGGATCCCTGGCACGCCACCATGGTCT        | 29            | 74.75               | 65                         |
| ptox2-reverse-R | CGCCACGTGACGGTGGCGCGCATCCCC          | 27            | 77.61               |                            |
| ptox2-intron-F  | ACCATGGTGGCGTGCCAGGTGTGTATTTTGGAAGGG | 36            | 71.09               | 60                         |
| ptox2-intron-R  | CTAGGATCCCTTTGTGCGATATGCCGCCCCG      | 29            | 66.71               |                            |
| PTOX1-qRT-F     | GATGGACACGGAAGCAGCA                  | 19            | 58.4                | 58                         |
| PTOX1-qRT-R     | GTCCGCGAAGTAAACAGGCT                 | 20            | 58.07               |                            |
| PTOX2-qRT-F     | GATGGACACGGAAGCAGCA                  | 19            | 58.4                | 58                         |
| PTOX2-qRT-R     | TCTCGAGCACCCAGAACTTCTC               | 22            | 58.98               |                            |
| β-actin-F       | ACCCCGTGCTGCTGACTG                   | 18            | 61.69               | 58                         |
| β-actin-R       | ACGTTGAAGGTCTCGAACA                  | 19            | 53.48               |                            |



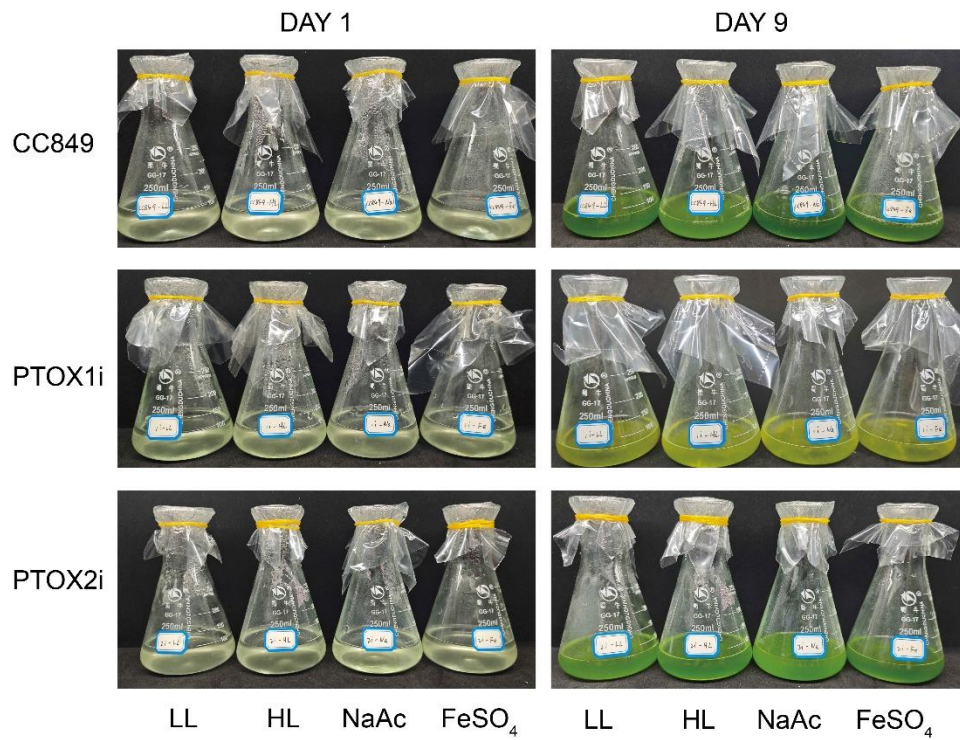

**Figure S1. Temporal growth dynamics of wild-type (CC849) and *pttox* mutants (PTOX1i and PTOX2i) under different conditions.** At day nine, the PTOX1i group exhibited an early decline in growth, as indicated by the yellow coloration of the culture medium. In contrast, the other groups maintained a deep green color, suggesting continued growth and vitality.
